# Supplementary material for: Neutral and Ionic Form of (Benzylthio)Acetic Acid in Novel Aminopyrimidine Based Multi-Component Crystalline Phases
Source: MDPI journal article supplement (doi:10.3390/cryst13121628), 2023-11-23
Supplement: s1 [file s1]

Supplementary Material

# Neutral and ionic form of (benzylthio)acetic acid in novel aminopyrimidine based multi-component crystalline phases

Justyna Sienkiewicz-Gromiuk <sup>1,\*</sup> and Aleksandra Drzewiecka-Antonik <sup>2</sup>

<sup>1</sup> Department of General and Coordination Chemistry and Crystallography, Institute of Chemical Sciences, Faculty of Chemistry, Maria Curie-Skłodowska University in Lublin, M. Curie-Skłodowska Sq. 2, 20-031 Lublin, Poland; justyna.sienkiewicz-gromiuk@mail.umcs.pl

<sup>2</sup> Institute of Physics, Polish Academy of Sciences, Aleja Lotników 32/46, 02-668 Warsaw, Poland; adrzew@ifpan.edu.pl

\* E-mail address for correspondence: justyna.sienkiewicz-gromiuk@mail.umcs.pl (J. S.-G.)

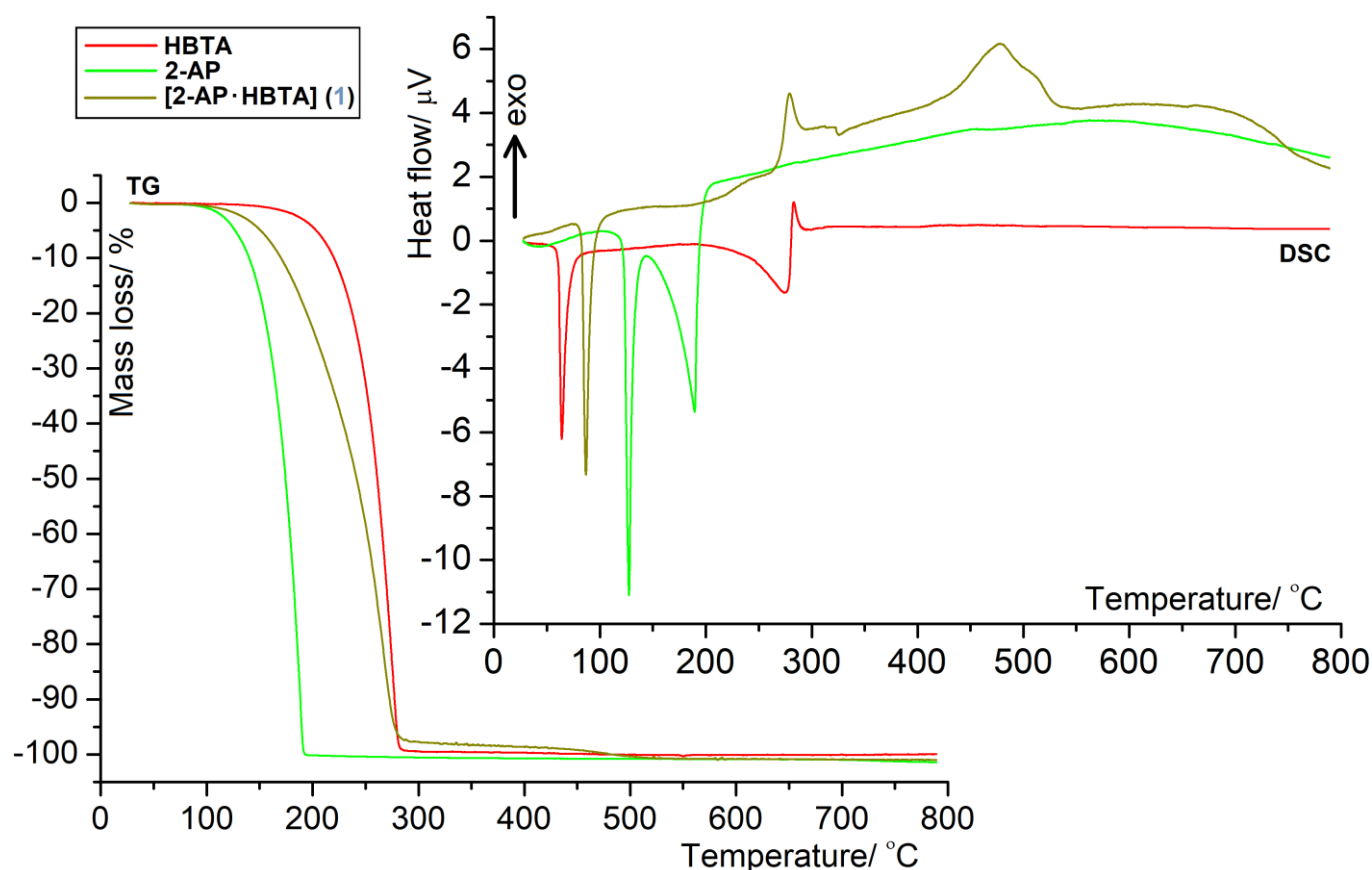

**Figure S1.** TG and DSC traces for HBTA, 2-AP and [2-AP·HBTA] (1) between 30 and 800 °C.

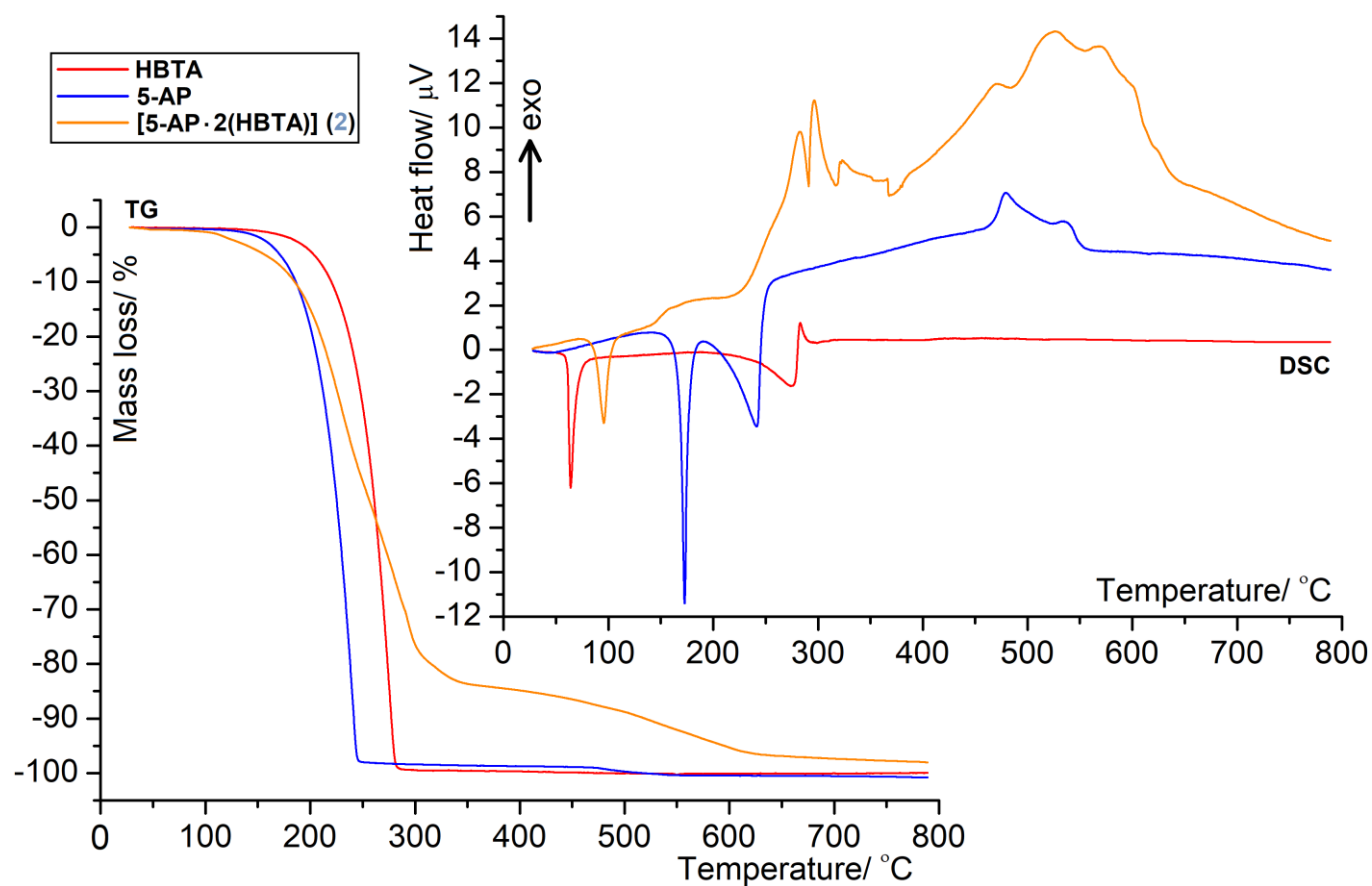

**Figure S2.** TG and DSC plots for HBTA, 5-AP and [5-AP·2(HBTA)] (2) between 30 and 800 °C.

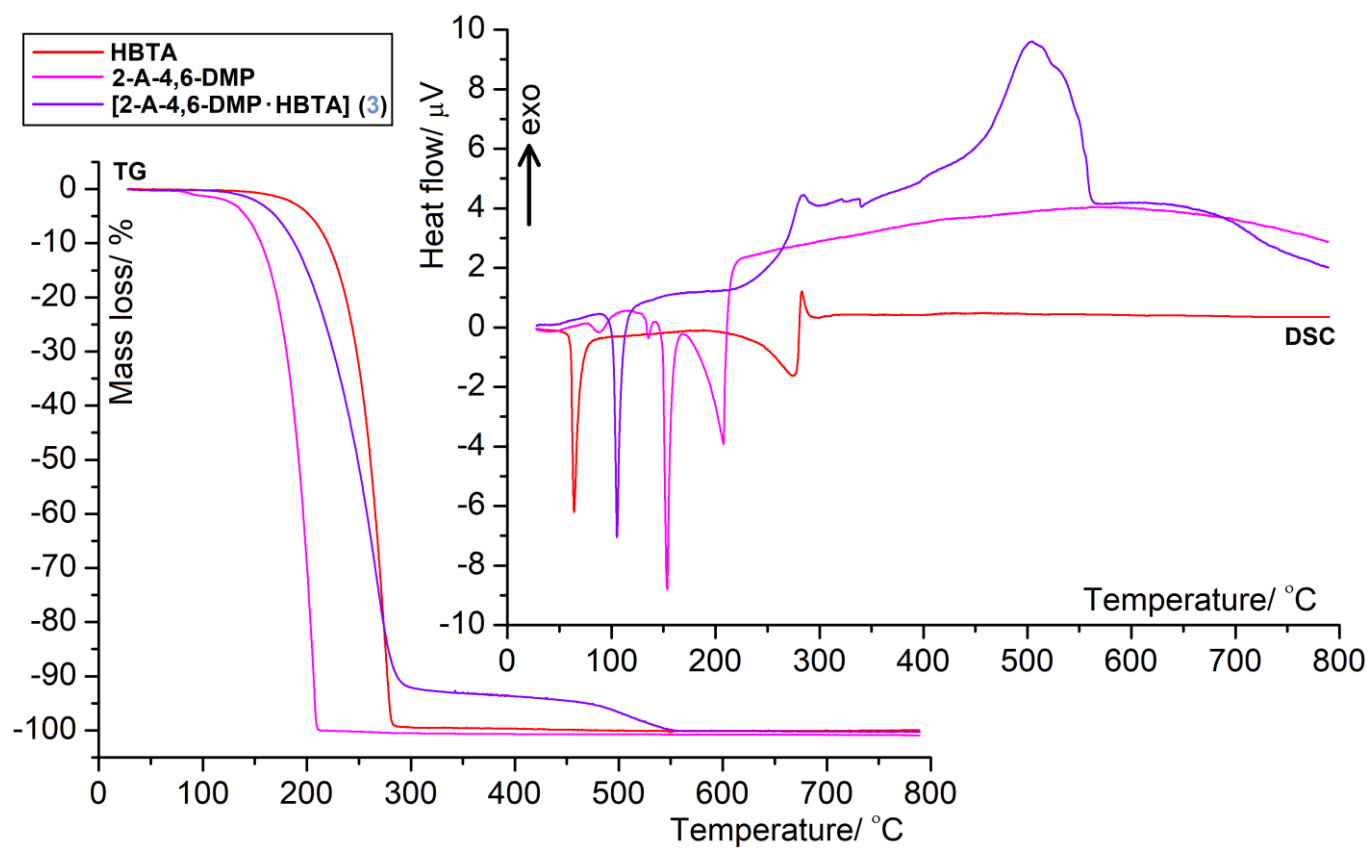

**Figure S3.** TG and DSC curves for [2-A-4,6-DMP·HBTA] (3) between 30 and 800 °C.

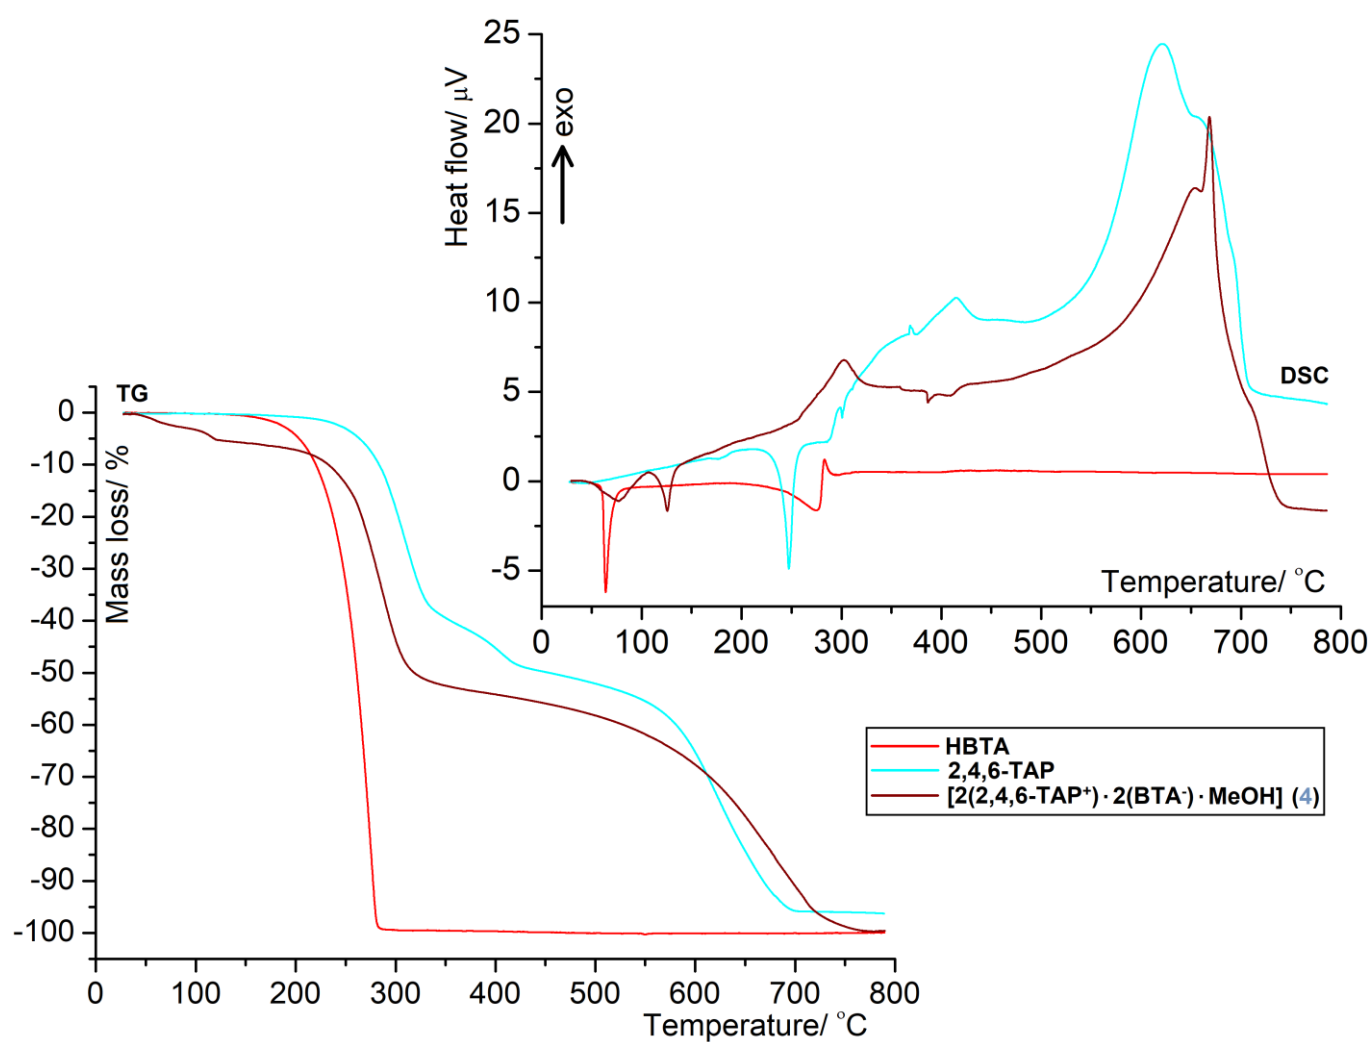

**Figure S4.** TG and DSC profiles for HBTA, 2,4,6-TAP and [2(2,4,6-TAP<sup>+</sup>)·2(BTA<sup>-</sup>)·MeOH] (4) between 30 and 800 °C.
